# Supplementary material for: Neuraminidase 1 (NEU1) promotes proliferation and migration as a diagnostic and prognostic biomarker of hepatocellular carcinoma
Source: PubMed Central journal article supplement (PMC5323129; doi:10.18632/oncotarget.11778), 2016-09-01
Supplement: oncotarget-07-64957-s001.pdf [file oncotarget-07-64957-s001.pdf]

## **Neuraminidase 1 (NEU1) promotes proliferation and migration as a diagnostic and prognostic biomarker of hepatocellular carcinoma**

### **SUPPLEMENTARY TABLE**

**Supplementary Table S1: Clinical information of the 114 patients.**

**See Supplementary File 1**
